# Supplementary material
Source: Springer Nature journal article supplement (https://www.springermedizin.de/resource/supplementary/12889_2012_4533_MOESM1_ESM.pdf/9492950)
Supplement: MOESM1 [file 9492950]

Ongoing marketing e.g. pack design, point of sale displays

The tobacco industry

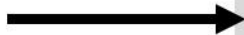

Retailers

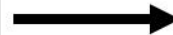

New and established smokers

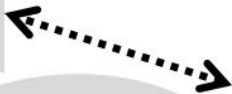

Antagonistic relationship

Regulators:  
e.g. Ministry of Health

No direct relationship between industry and retailers or smokers

The tobacco industry

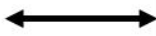

Tobacco Free Commission

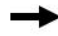

Licensed Retailers

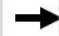

Established smokers
